# Supplementary material
Source: PubMed Central journal article supplement (PMC3607868)
Supplement: tjp0591-1235-SD1.pdf [file tjp0591-1235-SD1.pdf]

## ONLINE SUPPLEMENT

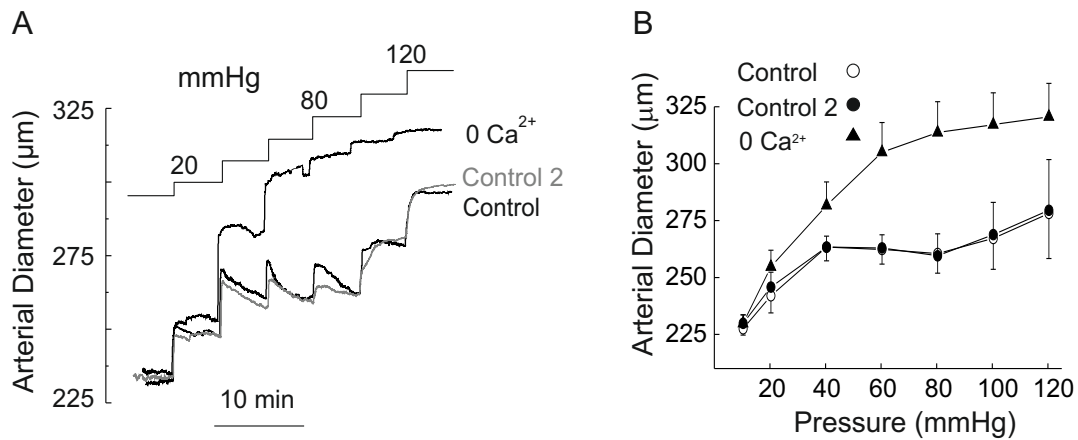

**Figure 1. Lack of time-dependent change in myogenic response of RGAs.**

Representative pressure-evoked changes in arterial diameter (A) and mean diameter ( $\pm$  SEM)-pressure relations (B;  $n = 3$ ) for pressure elevation to between 10-120 mmHg under control conditions (normal Krebs' saline Control and Control 2) and zero Ca<sup>2+</sup> saline (0 Ca<sup>2+</sup>). \* Significantly different ( $P < 0.05$ ) from control value.

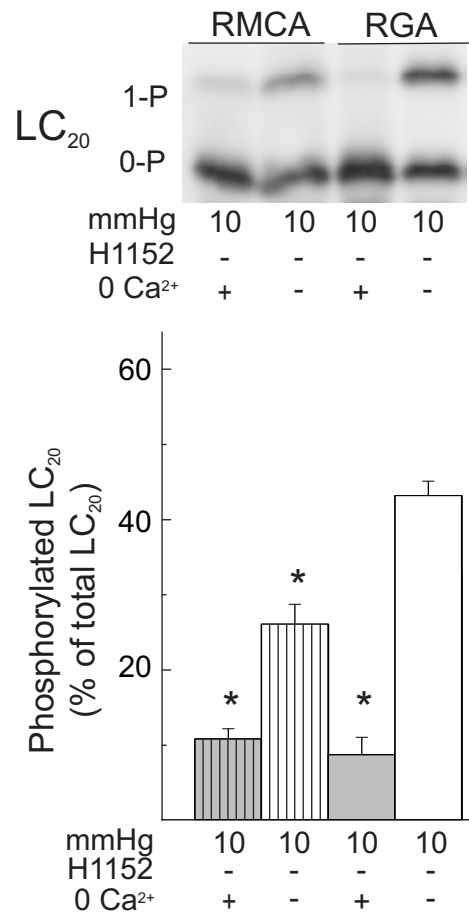

**Figure 2. Basal LC<sub>20</sub> phosphorylation is lower in cerebral than skeletal muscle arteries.** Representative western blot (upper) and mean level  $\pm$  SEM of phospho-LC<sub>20</sub> (pLC<sub>20</sub>; lower) as a % of total LC<sub>20</sub> at 10 mmHg ( $\pm$  0 Ca<sup>2+</sup>) (n = 4 for RMCAs and n = 7 with 1-2 arterial segments per sample for RGAs). Monophosphorylated and unphosphorylated LC<sub>20</sub> were separated by Phos-tag SDS-PAGE. \* indicates significant difference ( $P < 0.05$ ) from value in RGAs in the presence of Ca<sup>2+</sup> (note: the RGA data at 10 mmHg in the presence of Ca<sup>2+</sup> are from the blot in Fig. 4). These analyses of RGAs and RMCAs were carried out simultaneously to enable direct comparison of phospho-LC<sub>20</sub> content in the two tissues.
